# Supplementary figures and images for: Obesity-Activated Adipose-Derived Stromal Cells Promote Breast Cancer Growth and Invasion
Source: PubMed Central journal article supplement — Neoplasia. 2018 Oct 12;20(11):1161–74. doi: 10.1016/j.neo.2018.09.004 (PMC6187054; doi:10.1016/j.neo.2018.09.004), 2018-10-12

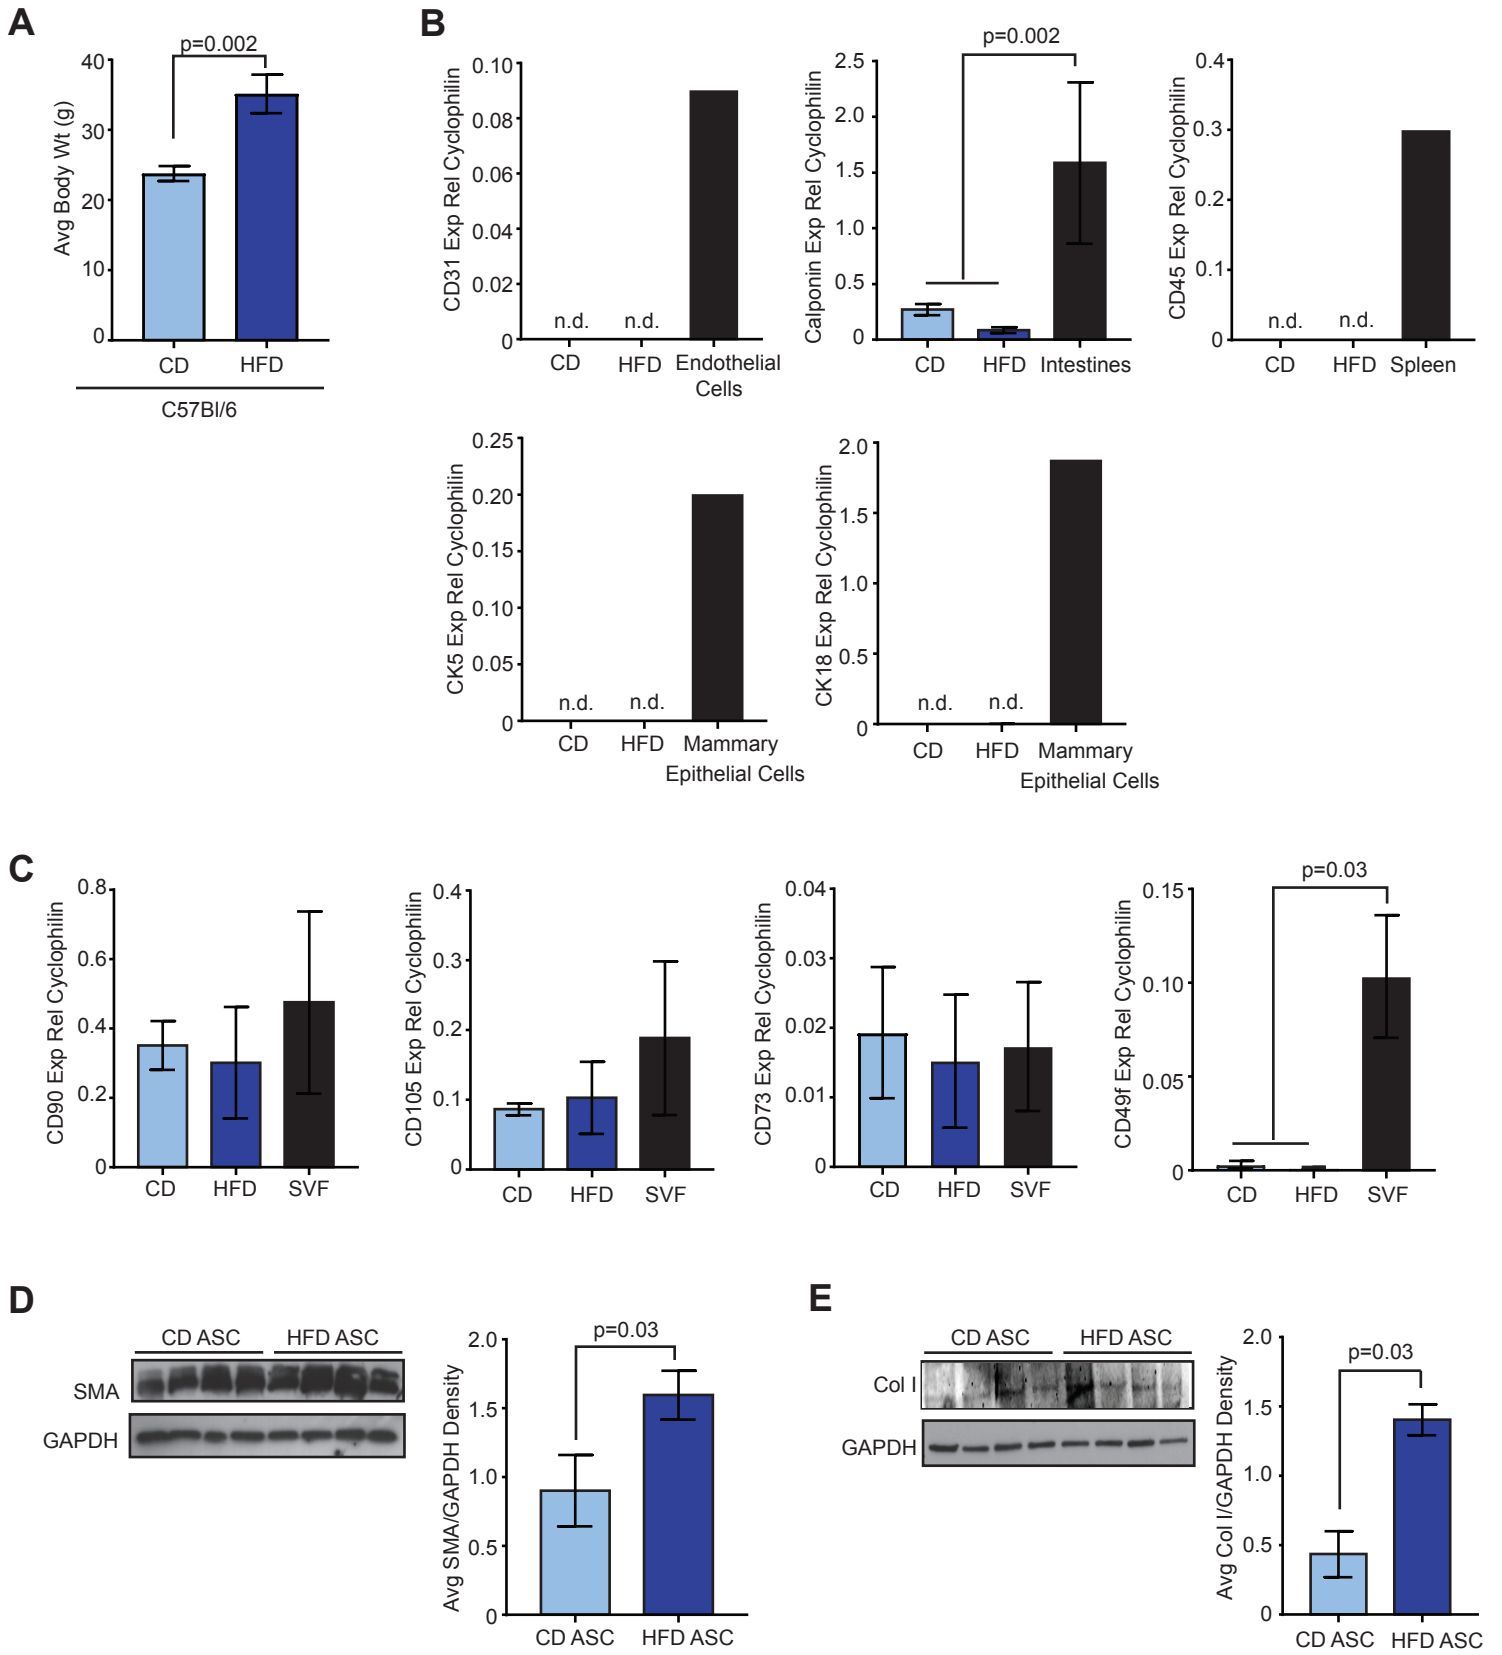

Supplement: mmc1.pdf [file mmc1.pdf]

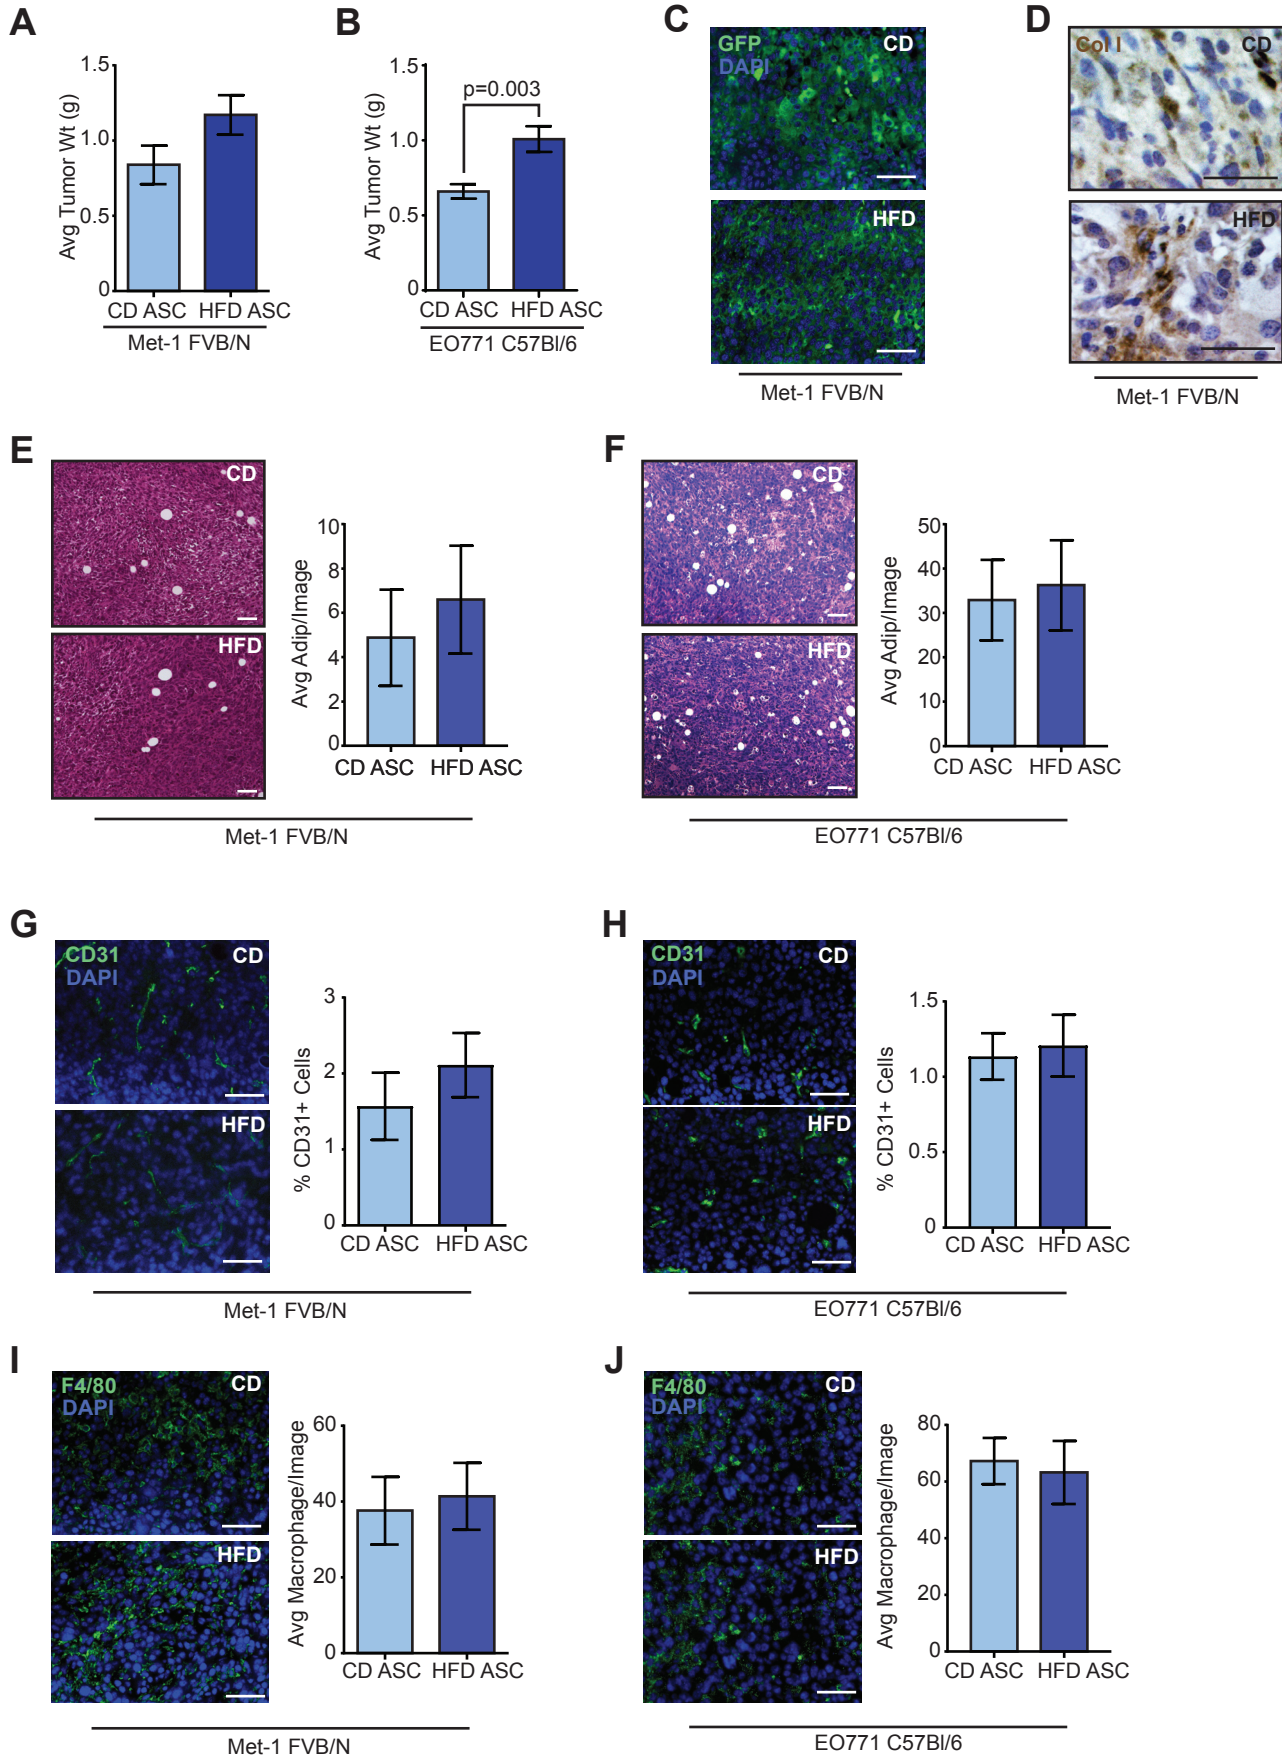

Supplement: mmc2.pdf [file mmc2.pdf]

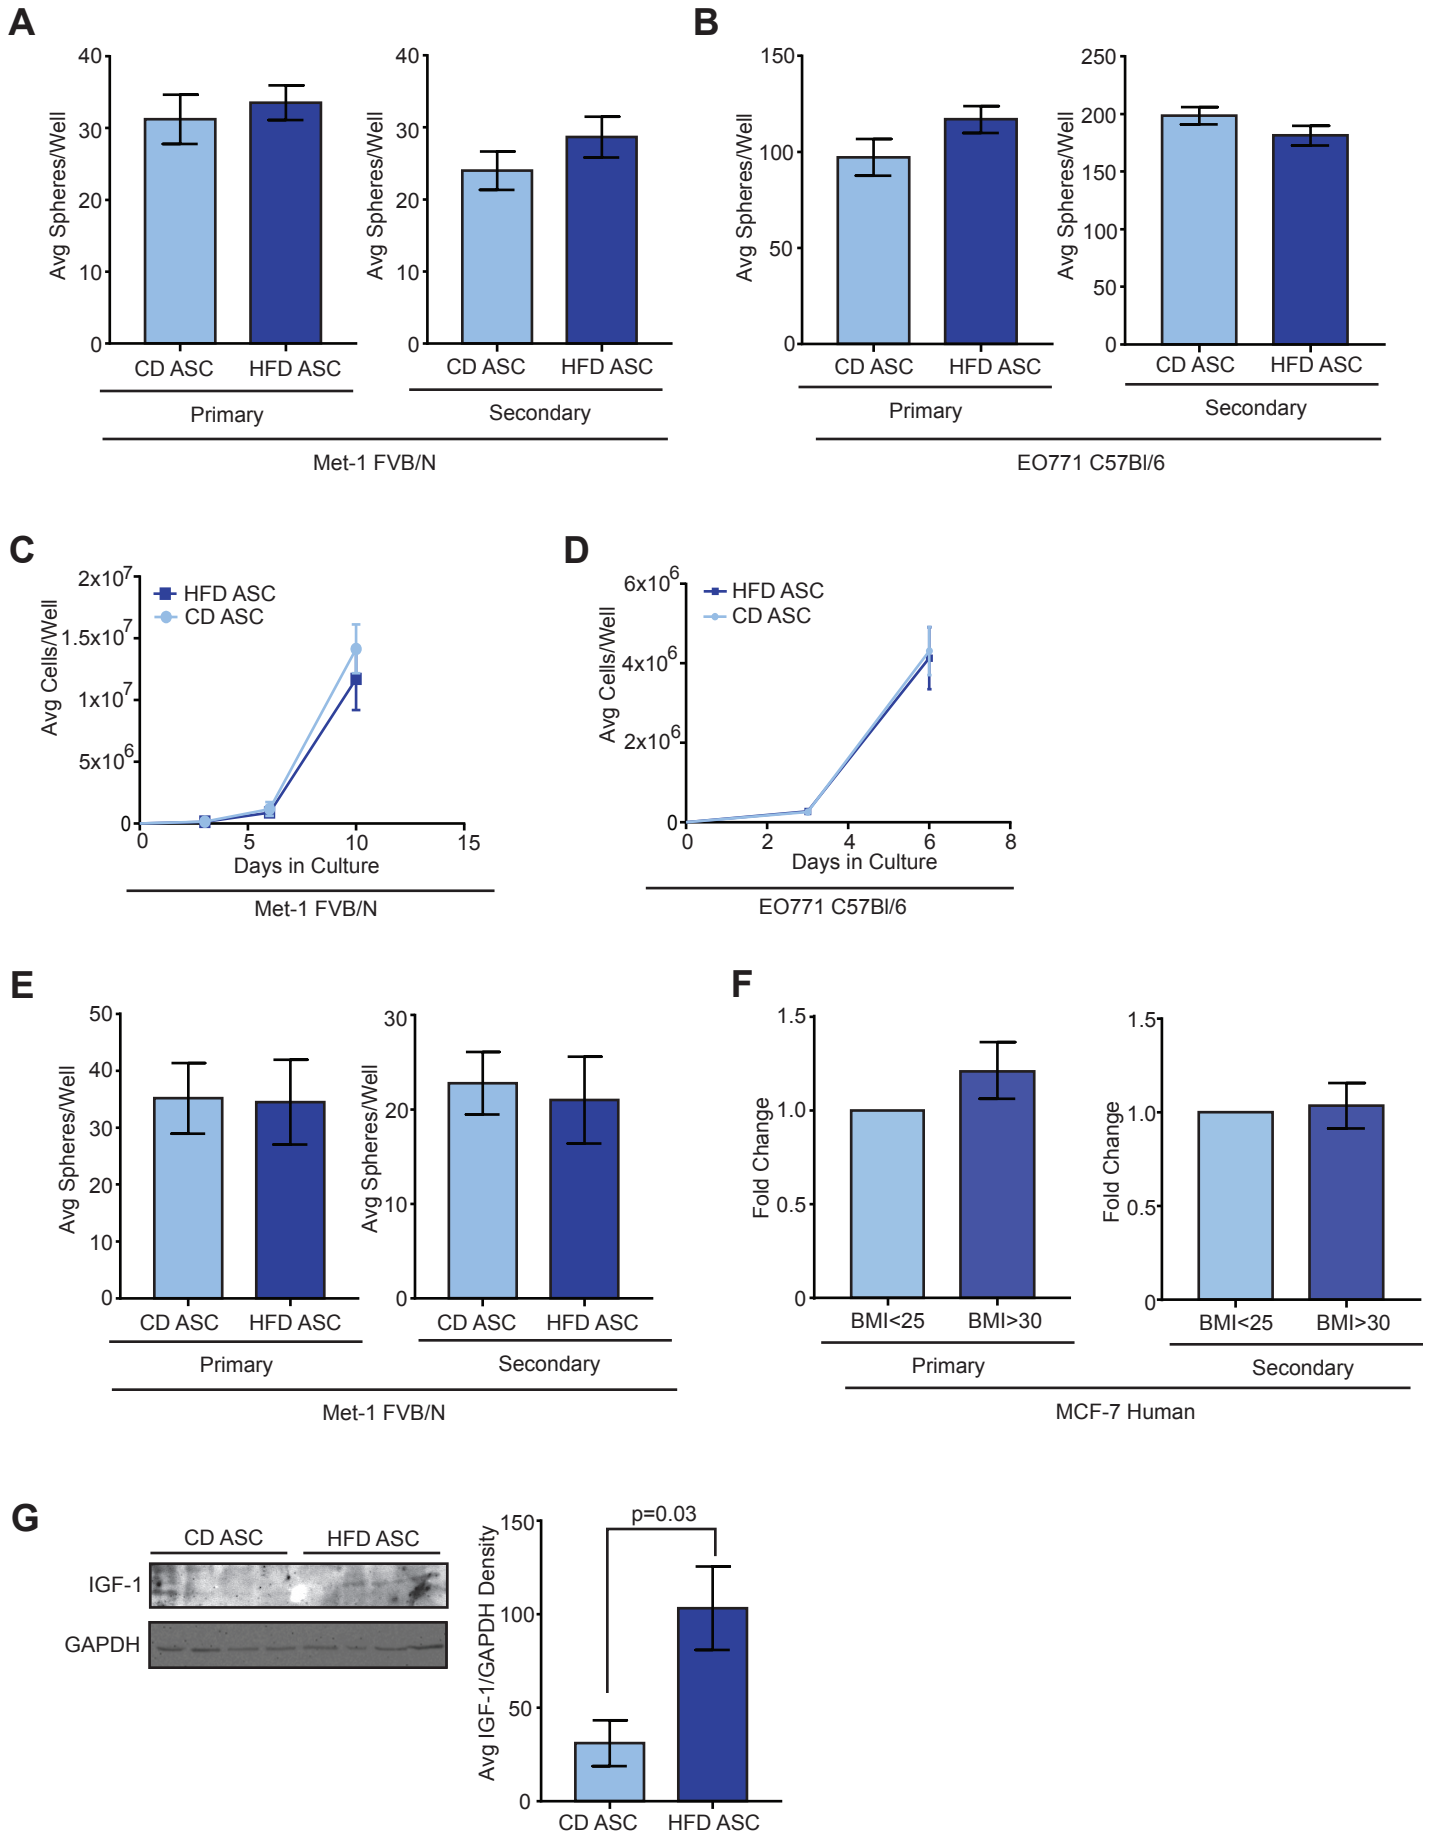

Supplement: mmc3.pdf [file mmc3.pdf]
